# Supplementary material for: An observational study of uptake and adoption of the NHS App in England
Source: bioRxiv or medRxiv preprint supplement (doi:10.1101/2022.03.16.22272200), 2022-05-27

## **Appendix**

**Table 1: Summary of NHS app data metrics available from the NHS App Dashboard**

| <b>Metric Name</b>                          | <b>Granularity</b> | <b>Description</b>                                                                                    |
|---------------------------------------------|--------------------|-------------------------------------------------------------------------------------------------------|
| NHS App Registrations                       | GP practice        | Number of App users who have obtained P9 verification (full access) in the specified reporting period |
| NHS App downloads                           | National           | Number of NHS App downloads from Google and Apple Stores in the specified reporting period            |
| Total GP registered patients aged 13+ years | GP practice        | Number of patients registered at a general practice to date (cumulative)                              |
| NHS App Logins                              | GP practice        | Number of NHS App logins in the specified reporting period                                            |
| Users Booking Appointments                  | GP practice        | Number of GP appointments booked in the specified reporting period                                    |
| Appointment Cancellation                    | GP practice        | Number of GP appointments canceled in the specified reporting period                                  |
| Users Requesting Prescriptions              | GP practice        | Number of prescriptions requested in the specified reporting period                                   |
| User Accessing GP health records            | GP practice        | Number of GP health records accessed in the specified reporting period                                |
| Users Visiting NHS 111 Online               | National           | Number of App users visiting NHS 111 online from the NHS App in the specified reporting period        |
| Organ Donation Registrations                | GP practice        | Number of organ donor registrations in the specified reporting period                                 |
| Organ Donation Updates                      | GP practice        | Number of organ donation status updates in the specified reporting period                             |
| Organ Donation Withdrawals                  | GP practice        | Number of organ donor registration withdrawals in the specified reporting period                      |
| Users Visiting Health A-Z                   | National           | Number of App users visiting the Health A-Z page in the specified reporting period                    |

|                                            |          |                                                                                                  |
|--------------------------------------------|----------|--------------------------------------------------------------------------------------------------|
| Users visiting<br>National Data<br>Opt-out | National | Number of App users visiting the National Data opt-out page in the<br>specified reporting period |
|--------------------------------------------|----------|--------------------------------------------------------------------------------------------------|

**Graph 1: Login Sessions & Appointments Booked Interrupted Times Series-Without May 2021 data**

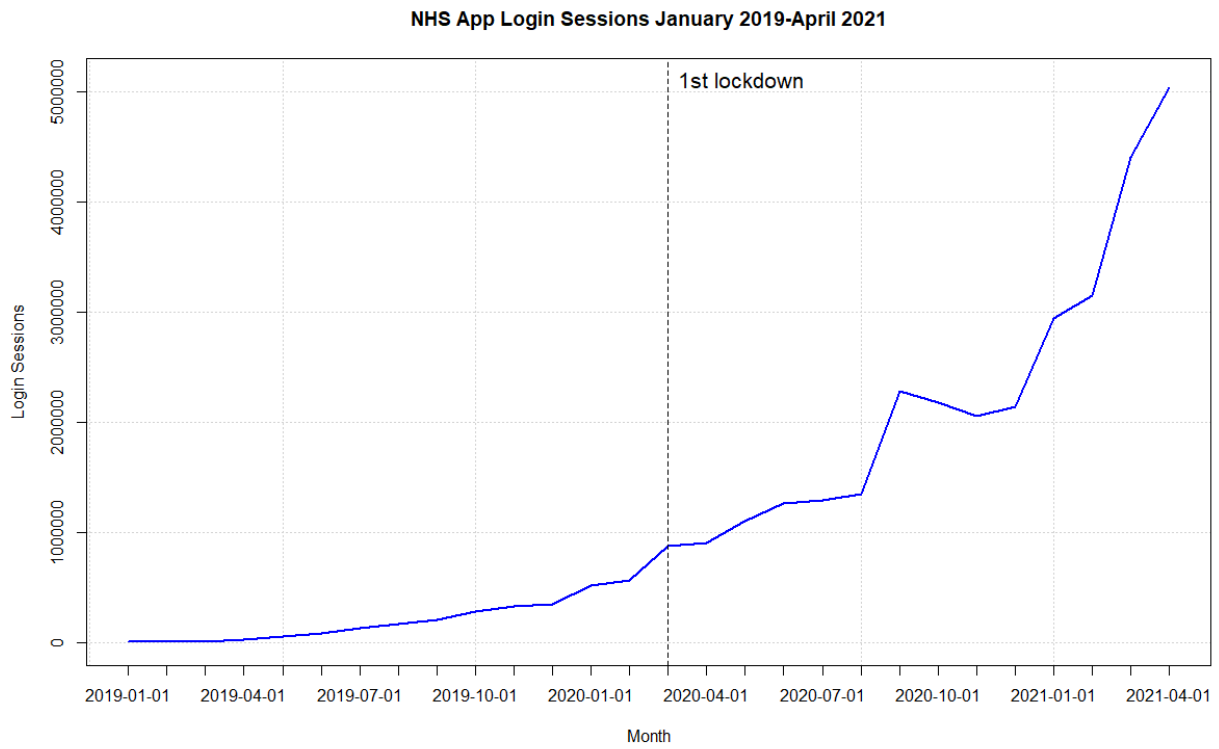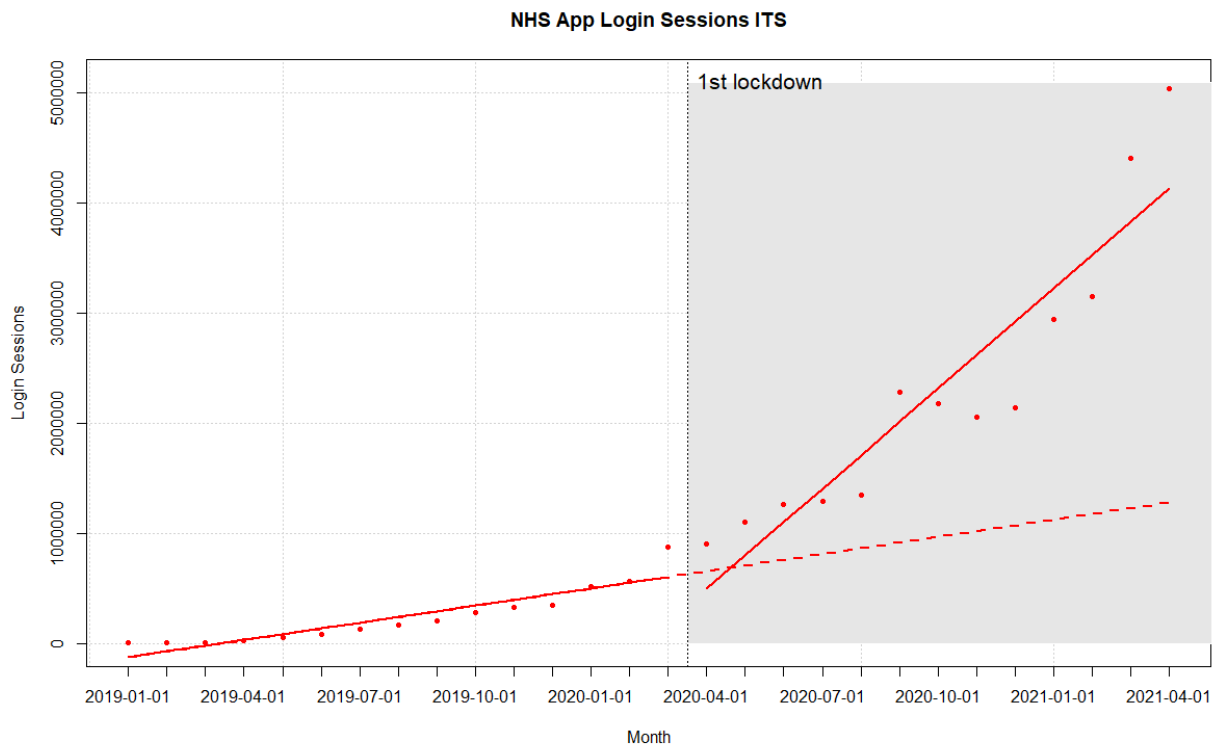

NHS App Appointments Booked January 2019-April 2021

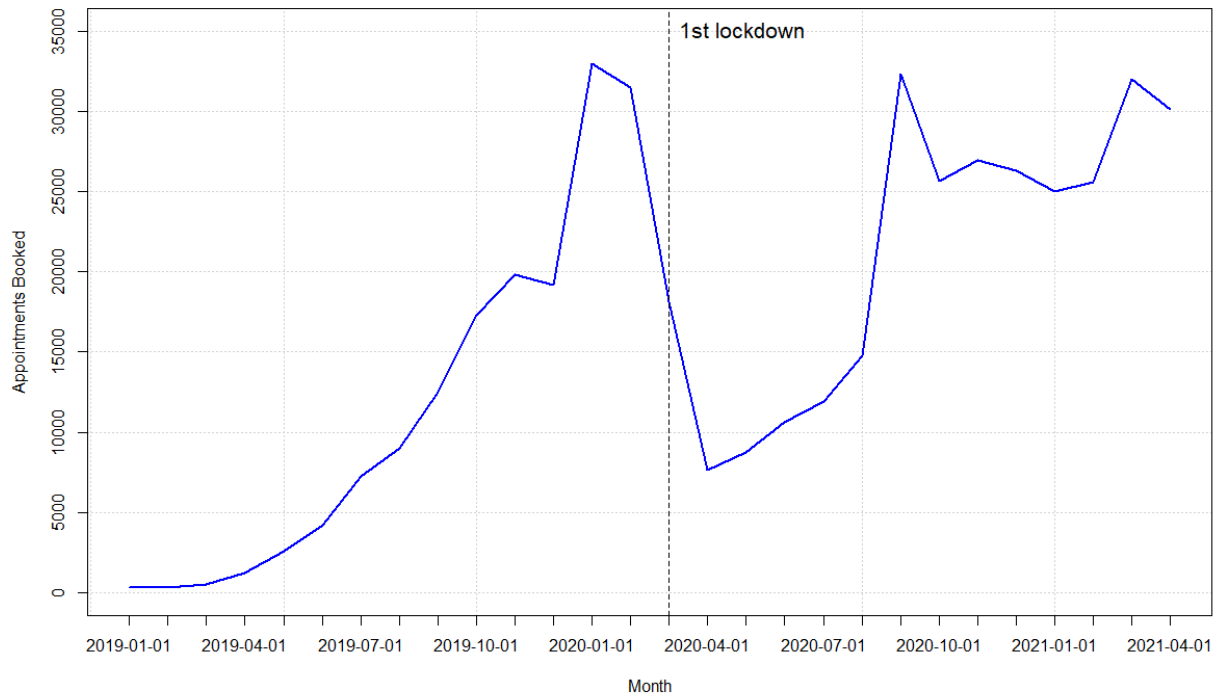

NHS App Appointments Booked ITS

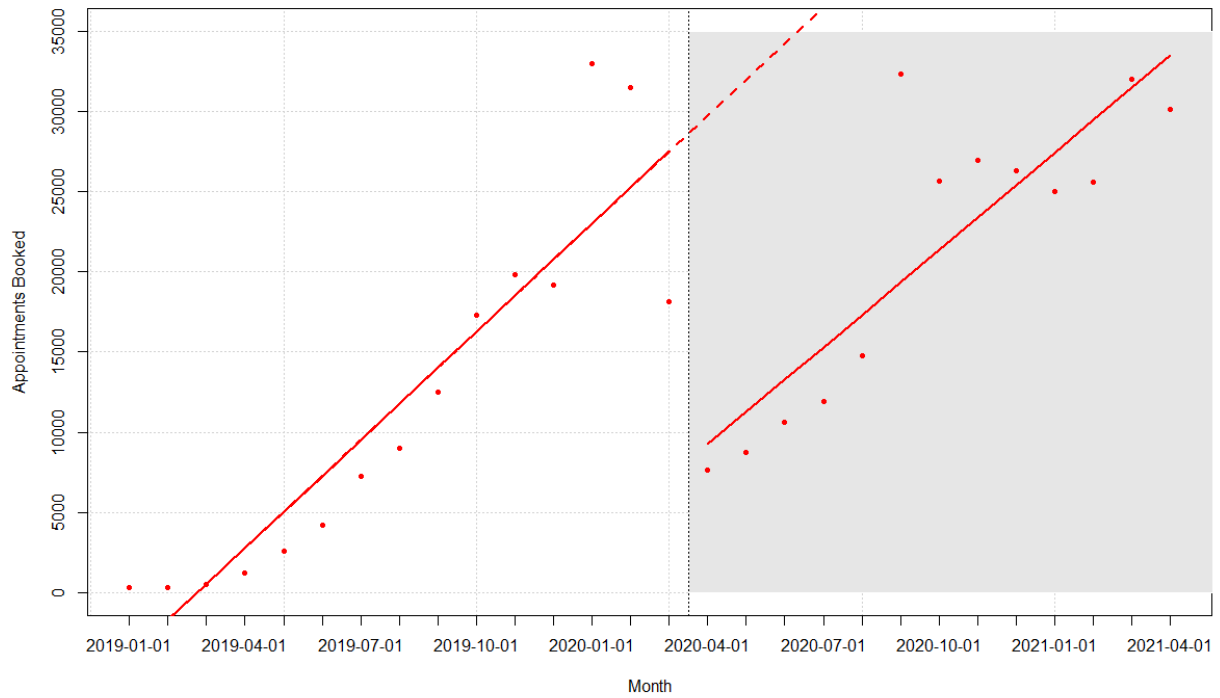

**Graph 2: GP Health Records Views & Prescriptions Ordered Interrupted Times Series-Without May 2021 data**

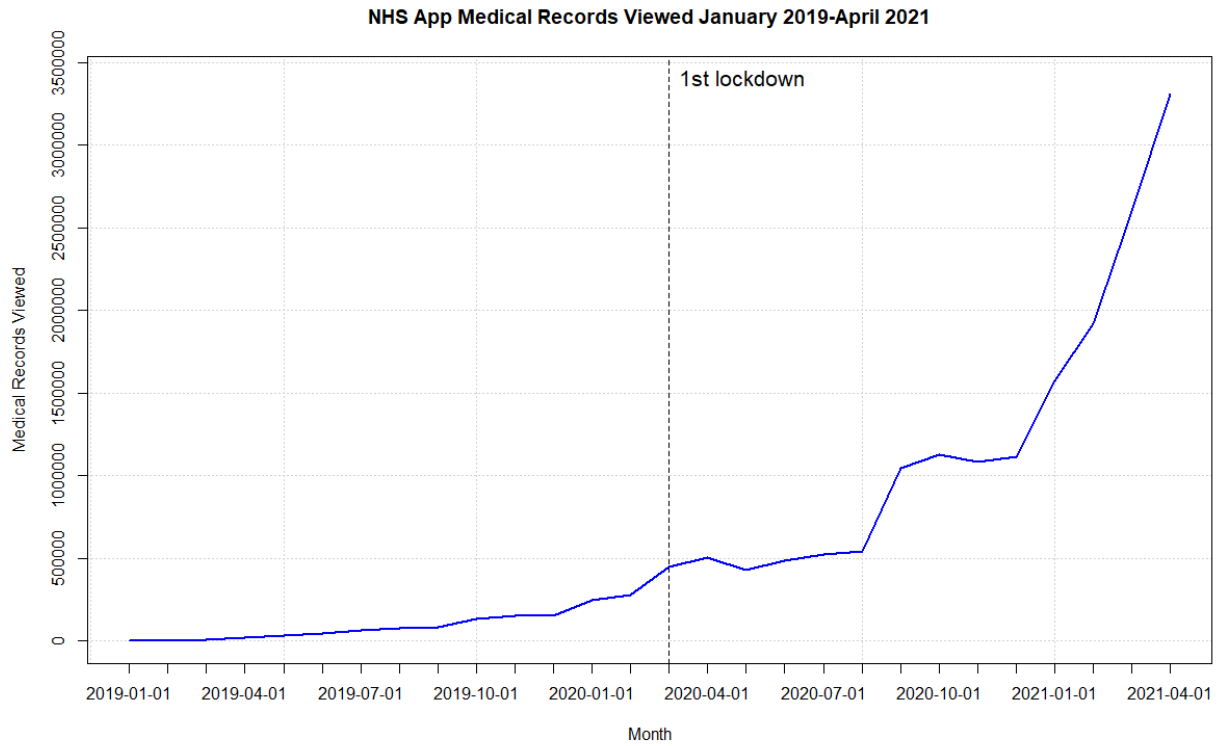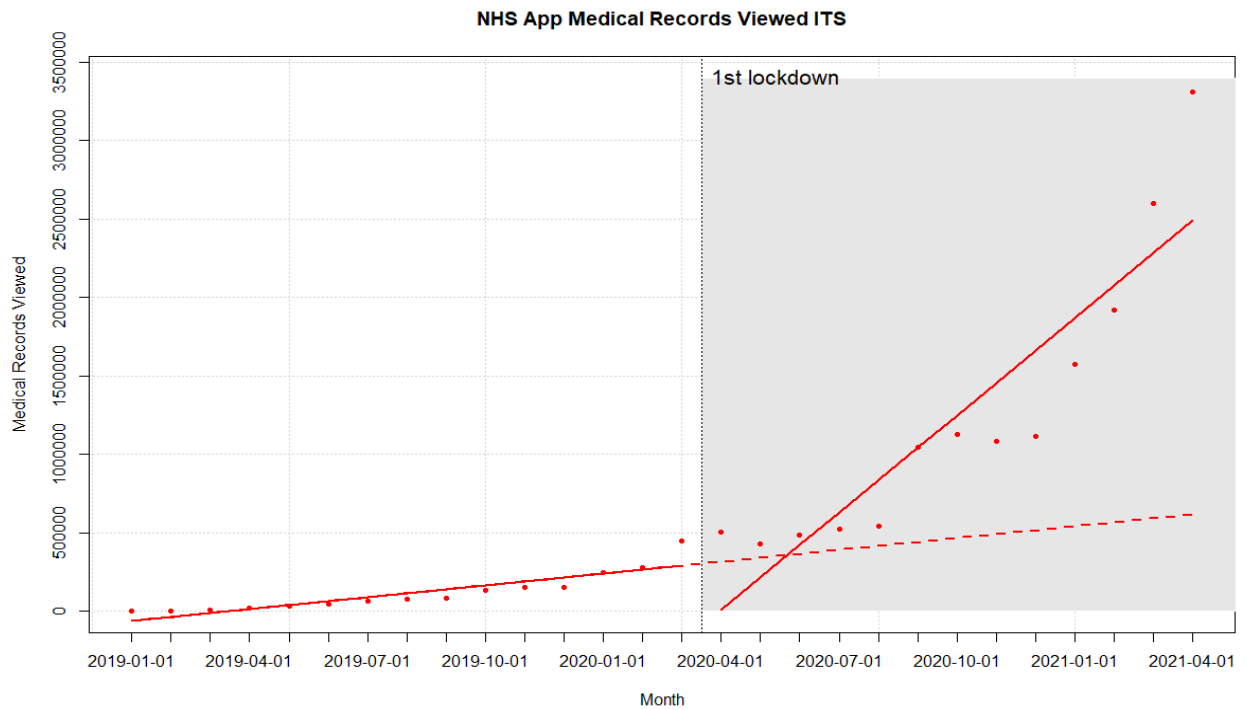

NHS App Prescriptions Ordered January 2019-April 2021

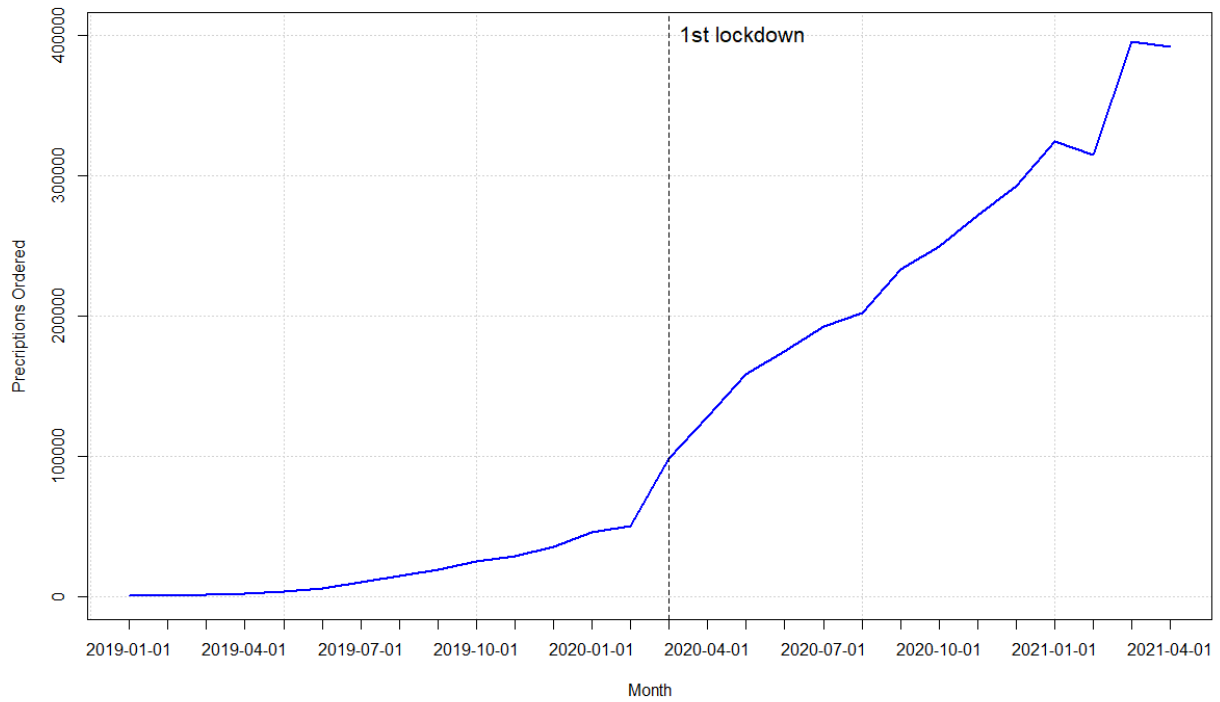

NHS App Prescriptions Ordered ITS

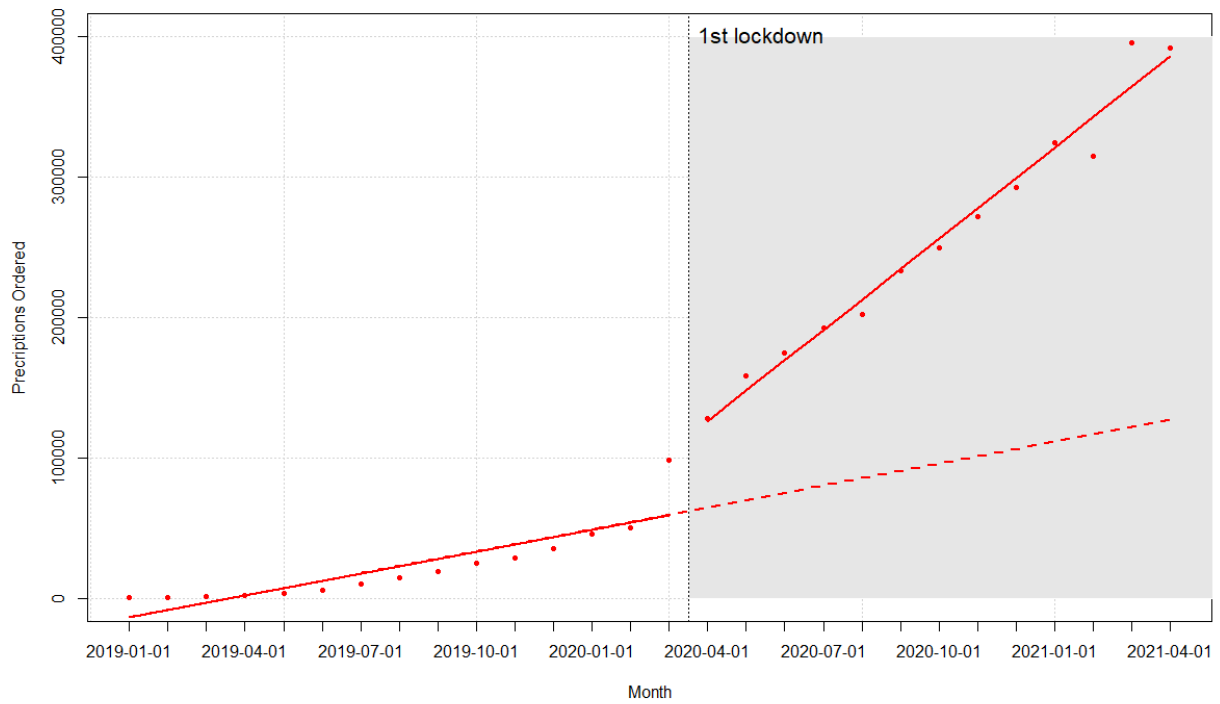

Supplement: Supplementary file [file media-1.pdf]
